# Supplementary material for: Hippocampal volume in patients with bilateral and unilateral peripheral vestibular dysfunction
Source: PubMed Central journal article supplement (PMC9668627; doi:10.1016/j.nicl.2022.103212), 2022-09-28
Supplement: mmc1.pdf [file mmc1.pdf]

## Supplementary Material

*Supplementary Table S1: List of features used for the three classifiers. L: left, R: right.*

| FreeSurfer aseg             | DL shape radiomics          | Hippocampal Subfields   |
|-----------------------------|-----------------------------|-------------------------|
| L/R VentralDC               | L/R VoxelVolume             | L/R subiculum           |
| L/R Thalamus-Proper         | L/R SurfaceVolumeRatio      | L/R presubiculum        |
| L/R Putamen                 | L/R SurfaceArea             | L/R parasubiculum       |
| L/R Pallidum                | L/R Sphericity              | L/R molecular-layer-HP  |
| L/R Lateral-Ventricle       | L/R MinorAxisLength         | L/R hippocampal-fissure |
| L/R Inf-Lat-Vent            | L/R MeshVolume              | L/R fimbria             |
| L/R Hippocampus             | L/R Maximum3DDiameter       | L/R Whole-hippocampus   |
| L/R Cerebellum-White-Matter | L/R Maximum2DDiameterSlice  | L/R Hippocampal-tail    |
| L/R Cerebellum-Cortex       | L/R Maximum2DDiameterRow    | L/R HATA                |
| L/R Caudate                 | L/R Maximum2DDiameterColumn | L/R GC-ML-DG            |
| L/R Amygdala                | L/R MajorAxisLength         | L/R CA4                 |
| L/R Accumbens-area          | L/R LeastAxisLength         | L/R CA3                 |
| CortexVol                   | L/R Flatness                | L/R CA1                 |
| CerebralWhiteMatterVol      | L/R Elongation              |                         |
| 4th-Ventricle               |                             |                         |
| 3rd-Ventricle               |                             |                         |

*Supplementary Table S2: Detailed medical information of diagnosis, lesion side, side of vestibular dysfunction, and degree of vestibular deafferentation of each patient with a peripheral vestibular dysfunction (PVD).*

|                             | Diagnosis                                                                 | Lesion side  | Side of vestibular dysfunction <sup>1</sup> | Degree of vestibular deafferentation <sup>2</sup> |
|-----------------------------|---------------------------------------------------------------------------|--------------|---------------------------------------------|---------------------------------------------------|
| Patients with bilateral PVD |                                                                           |              |                                             |                                                   |
| 1                           | vestibular neuritis right; vestibular schwannoma left                     | right & left | right & left                                | incomplete right; complete left                   |
| 2                           | vestibular schwannoma right; idiopathic left                              | right & left | right & left                                | complete right; incomplete left                   |
| 3                           | idiopathic right; idiopathic left,                                        | right & left | right & left                                | complete right; complete left                     |
| 4                           | endolymphatic hydrops right; endolymphatic hydrops left                   | right & left | right & left                                | complete right; complete left                     |
| 5                           | idiopathic right; idiopathic left                                         | right & left | right & left                                | complete right; incomplete left                   |
| 6                           | dehiscence semicircular canals right; dehiscence semicircular canals left | right & left | right & left                                | complete right; complete left                     |
| 7                           | idiopathic right; idiopathic left                                         | right & left | right & left                                | complete right; complete left                     |
| 8                           | idiopathic right; idiopathic left                                         | right & left | right & left                                | incomplete right; complete left                   |
| 9                           | idiopathic right; idiopathic left                                         | right & left | right & left                                | complete right; complete left                     |
| 10                          | vestibular schwannoma right; idiopathic left                              | right & left | right & left                                | complete right; complete left                     |
| 11                          | vestibular schwannoma right; idiopathic left                              | right & left | right & left                                | complete right; incomplete left                   |
| 12                          | vestibular neuritis right; idiopathic left                                | right & left | right & left                                | complete right; complete left                     |
| 13                          | idiopathic right; idiopathic left                                         | right & left | right & left                                | complete right; complete left                     |
| 14                          | idiopathic right; idiopathic left                                         | right & left | right & left                                | complete right; complete left                     |
| 15                          | vestibular neuritis right; vestibular neuritis left                       | right & left | right & left                                | incomplete right; incomplete left                 |
| 16                          | meningitis right; meningitis left                                         | right & left | right & left                                | complete right; complete left                     |
| 17                          | idiopathic right; idiopathic left                                         | right & left | right & left                                | incomplete right; incomplete left                 |
| 18                          | idiopathic right; idiopathic left                                         | right & left | right & left                                | complete right; complete left                     |
| 19                          | idiopathic right; idiopathic left                                         | right & left | right & left                                | complete right; complete left                     |

---

Patients with  
chronic  
unilateral  
PVD

|    |                       |       |       |            |
|----|-----------------------|-------|-------|------------|
| 1  | vestibular schwannoma | left  | left  | complete   |
| 2  | vestibular schwannoma | left  | left  | complete   |
| 3  | vestibular schwannoma | right | right | incomplete |
| 4  | vestibular schwannoma | left  | left  | incomplete |
| 5  | vestibular schwannoma | right | right | complete   |
| 6  | vestibular schwannoma | left  | left  | incomplete |
| 7  | vestibular schwannoma | right | right | complete   |
| 8  | endolymphatic hydrops | right | right | incomplete |
| 9  | vestibular schwannoma | left  | left  | complete   |
| 10 | vestibular schwannoma | left  | left  | complete   |
| 11 | vestibular schwannoma | right | right | incomplete |
| 12 | vestibular neuritis   | right | right | incomplete |
| 13 | zoster oticus         | left  | left  | complete   |
| 14 | vestibular schwannoma | left  | left  | complete   |
| 15 | vestibular schwannoma | right | right | incomplete |
| 16 | vestibular schwannoma | left  | left  | complete   |
| 17 | vestibular neuritis   | right | right | complete   |
| 18 | vestibular schwannoma | left  | left  | incomplete |
| 19 | Menière's disease     | right | right | incomplete |
| 20 | vestibular neurectomy | left  | left  | complete   |
| 21 | meningitis            | left  | left  | incomplete |

---

| Patients with acute unilateral PVD |                     |       |       |            |
|------------------------------------|---------------------|-------|-------|------------|
| 1                                  | vestibular neuritis | left  | left  | complete   |
| 2                                  | vestibular neuritis | right | right | incomplete |
| 3                                  | vestibular neuritis | left  | left  | incomplete |
| 4                                  | vestibular neuritis | right | right | incomplete |
| 5                                  | vestibular neuritis | left  | left  | incomplete |
| 6                                  | vestibular neuritis | left  | left  | incomplete |
| 7                                  | vestibular neuritis | right | right | incomplete |
| 8                                  | vestibular neuritis | right | right | incomplete |
| 9                                  | idiopathic          | left  | left  | incomplete |
| 10                                 | vestibular neuritis | right | right | incomplete |
| 11                                 | vestibular neuritis | right | right | incomplete |
| 12                                 | vestibular neuritis | right | right | incomplete |
| 13                                 | vestibular neuritis | right | right | complete   |
| 14                                 | vestibular neuritis | right | right | incomplete |
| 15                                 | vestibular neuritis | right | right | complete   |

---

*Note.* <sup>1</sup>Side of vestibular dysfunction was categorized according to bithermal caloric testing.

<sup>2</sup> Degree of vestibular deafferentation was measured with bithermal caloric testing.

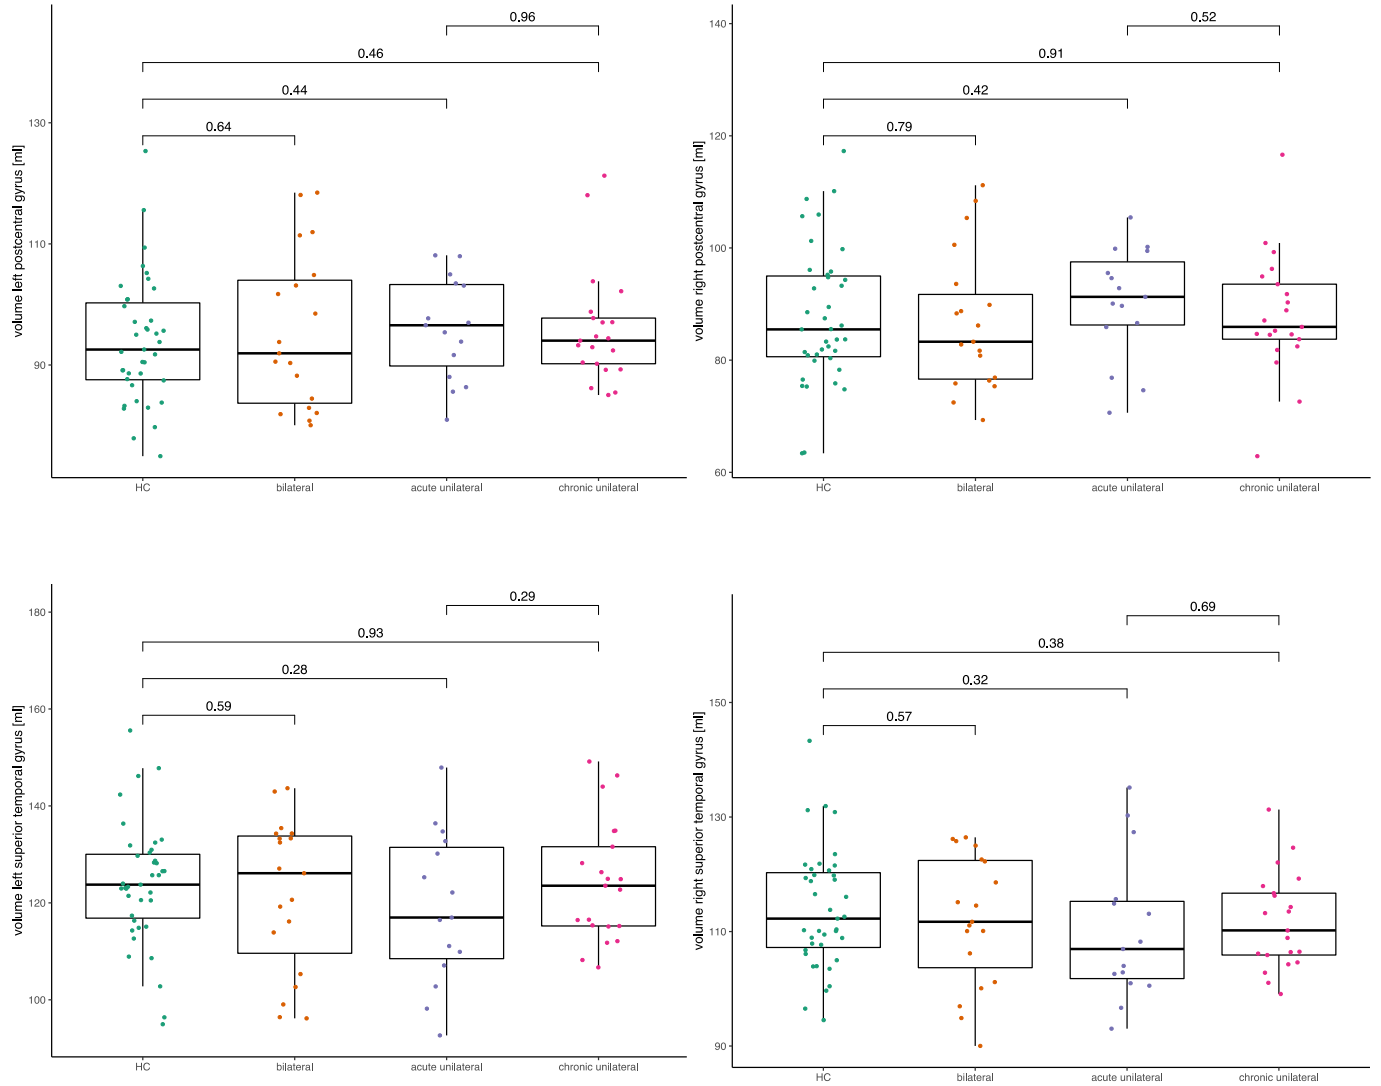

*Supplementary Figure S1: Boxplots showing volumes of the left and right postcentral gyrus (first row), and the left and right superior temporal gyrus (second row) in the different groups of patients with peripheral vestibular dysfunction and healthy controls (HC).*

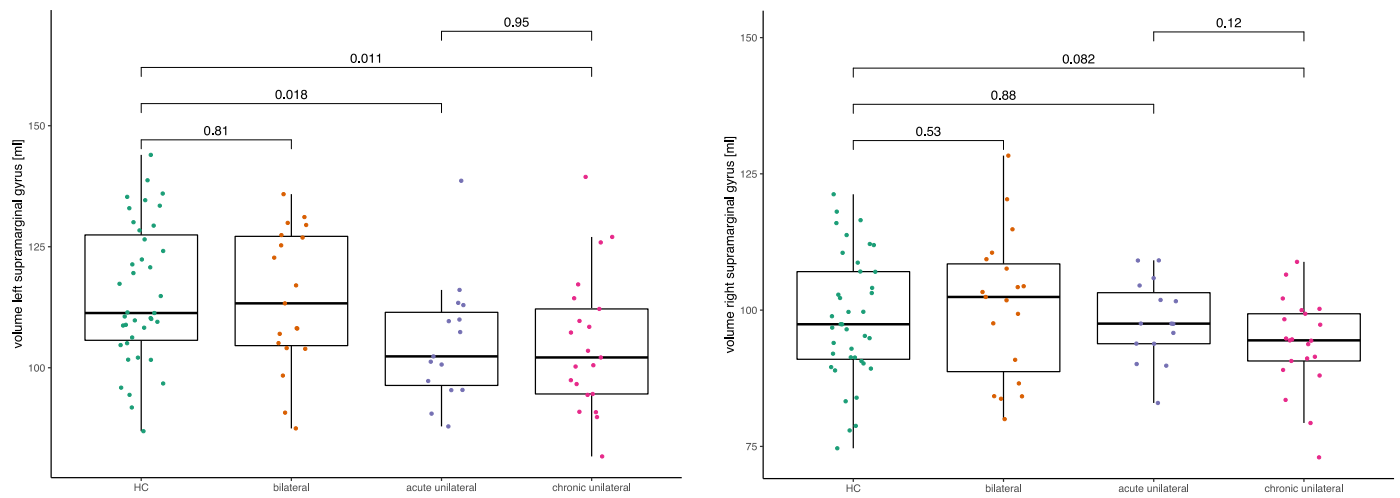

Supplementary Figure S2: Boxplots showing volumes of left and right supramarginal gyrus in the different groups of patients with peripheral vestibular dysfunction and healthy controls (HC).

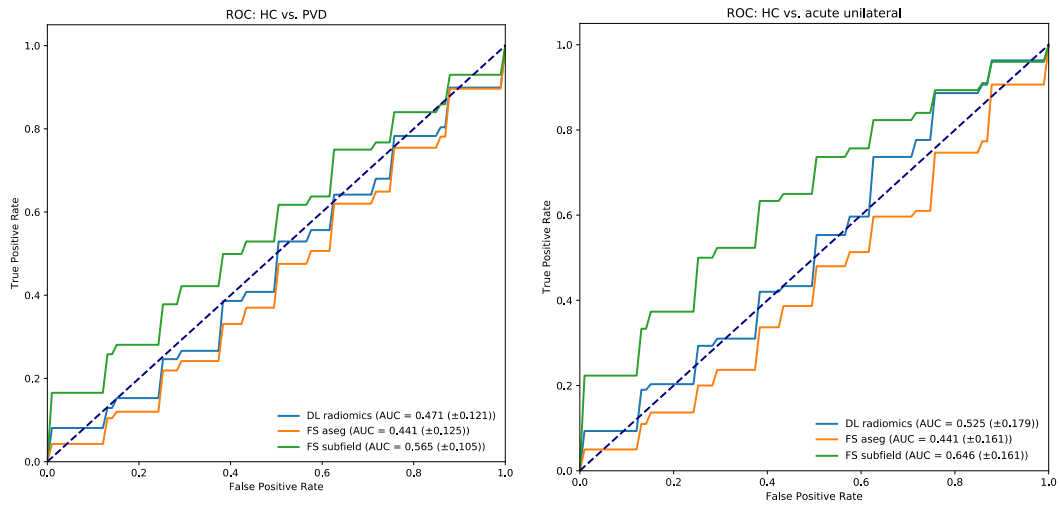

Supplementary Figure S3: Receiver operating characteristic curves (ROC) of the two classifiers for separating healthy controls (HC) from patients with peripheral vestibular dysfunction (PVD, left), and from the subgroup of patients with acute unilateral PVD (right). Shaded areas indicate one standard deviation.

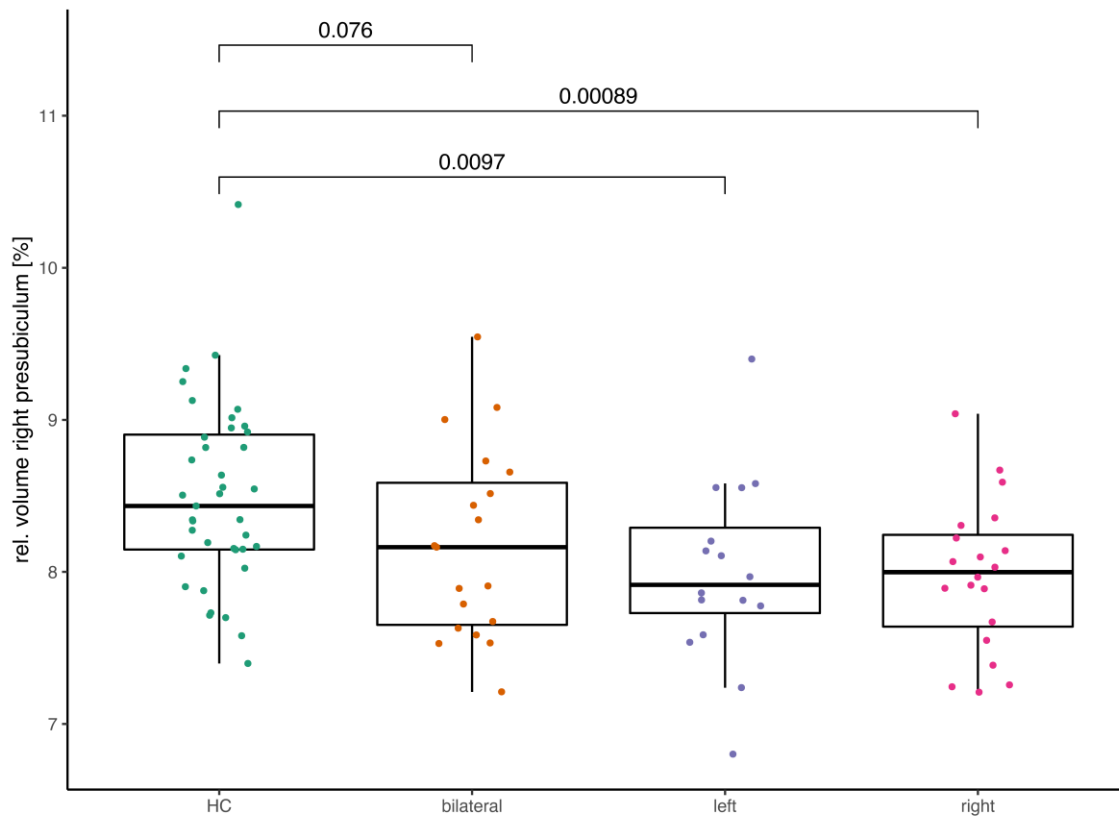

*Supplementary Figure S4: Boxplots showing the relative volume of the right presubiculum between healthy controls (HC) and the laterality of the disease of the patients with peripheral vestibular dysfunction.*

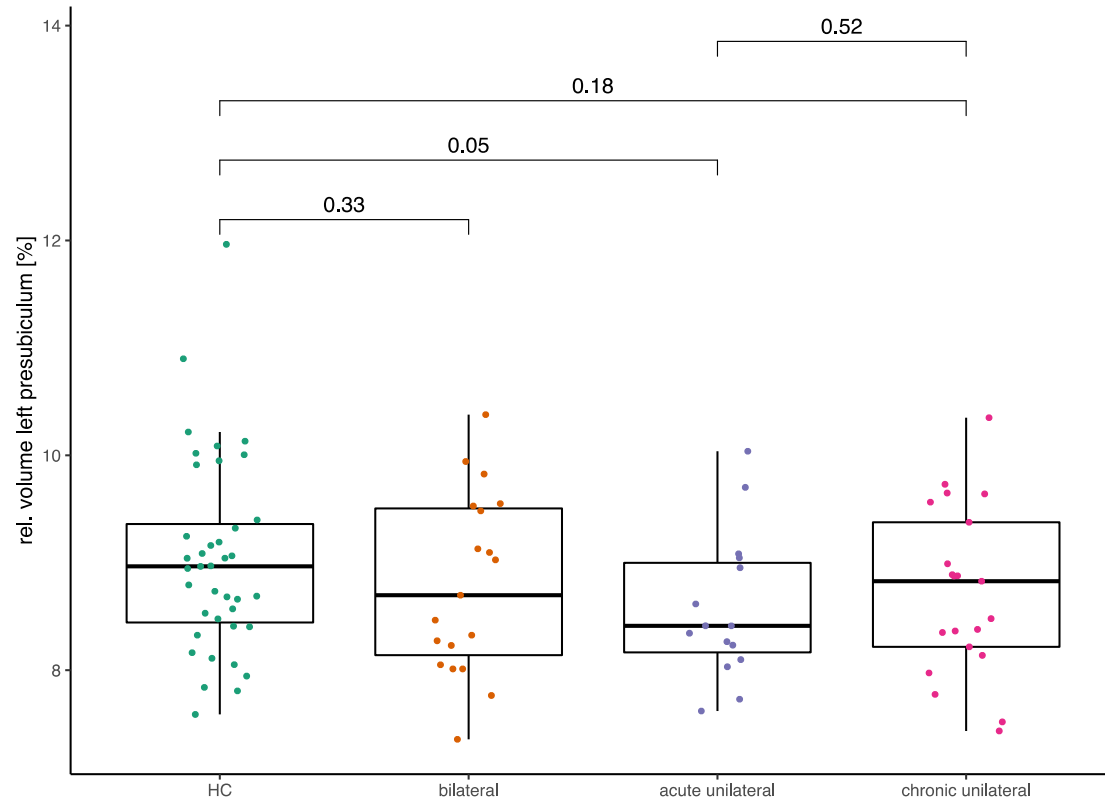

*Supplementary Figure S5: Boxplots showing the relative volume of the left presubiculum in the different groups of patients with peripheral vestibular dysfunction and healthy controls (HC).*



*Supplementary Table S3: Correlation table for right presubiculum and study variables with correlation coefficients (Kendall's Tau), 95% credible intervals and Bayes factors.*

| Variable                                         | <i>n</i> | <i>M</i> | <i>SD</i> | $\tau$ | 95% CI (lower) | 95% CI (upper) | BF <sub>10</sub> |
|--------------------------------------------------|----------|----------|-----------|--------|----------------|----------------|------------------|
| 1. Presubiculum Right <sup>a</sup>               | 94       | 294      | 38        | —      | —              | —              | —                |
| 2. Median Response Time Rotation <sup>b</sup>    | 89       | 1667     | 520       | -0.103 | -0.238         | 0.038          | 0.379            |
| 3. Response Time Rotation-Control <sup>b</sup>   | 89       | 406      | 224       | -0.075 | -0.211         | 0.065          | 0.237            |
| 4. Accuracy Rotation <sup>c</sup>                | 89       | 0.95     | 0.11      | 0.112  | -0.030         | 0.246          | 0.452            |
| 5. Accuracy Rotation-Control <sup>c</sup>        | 89       | -0.03    | 0.05      | 0.056  | -0.084         | 0.192          | 0.186            |
| 6. Color-Word Interference (D-KEFS) <sup>d</sup> | 89       | 10.0     | 2.3       | -0.046 | -0.281         | -0.001         | 0.978            |

<sup>a</sup> in mm<sup>3</sup>

<sup>b</sup> in ms

<sup>c</sup> in percent (%)

<sup>d</sup> in age-corrected Scaled Scores

*Supplementary Table S4: Correlation table for left supramarginal gyrus and study variables with correlation coefficients (Kendall's Tau), 95% credible intervals and Bayes factors.*

| Variable                                       | <i>n</i> | <i>M</i> | <i>SD</i> | $\tau$ | 95% CI (lower) | 95% CI (upper) | BF <sub>10</sub> |
|------------------------------------------------|----------|----------|-----------|--------|----------------|----------------|------------------|
| 1. Supramarginal Gyrus Left <sup>a</sup>       | 94       | 11154    | 1857      | —      | —              | —              | —                |
| 2. Median Response Time Rotation <sup>b</sup>  | 89       | 1667     | 520       | -0.022 | -0.159         | 0.117          | 0.145            |
| 3. Response Time Rotation-Control <sup>b</sup> | 89       | 406      | 224       | -0.134 | -0.268         | 0.008          | 0.766            |
| 4. Accuracy Rotation <sup>c</sup>              | 89       | 0.95     | 0.11      | 0.133  | -0.010         | 0.266          | 0.735            |
| 5. Accuracy Rotation-Control <sup>c</sup>      | 89       | -0.03    | 0.05      | 0.097  | -0.044         | 0.232          | 0.339            |

<sup>a</sup> in mm<sup>3</sup>

<sup>b</sup> in ms

<sup>c</sup> in percent (%)

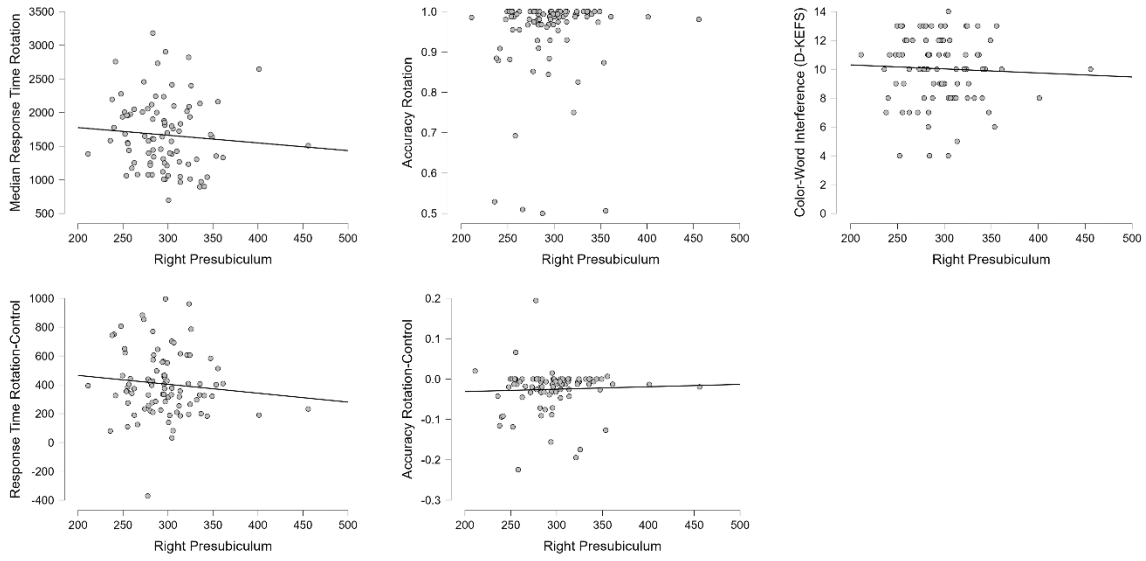

Supplementary Figure S6: Scatter plots for correlations between the right presubiculum and study variables.

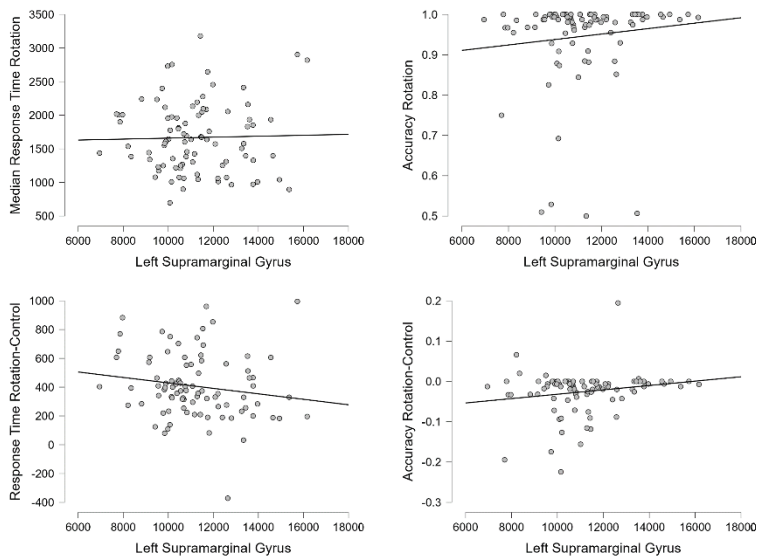

Supplementary Figure S7: Scatter plots for correlations between the left supramarginal gyrus and study variables.
